# Supplementary material for: Hemp-Based Microfluidics
Source: MDPI journal article supplement (doi:10.3390/mi12020182), 2021-02-12
Supplement: s1 [file s1]

Supplementary File

## Hemp-based microfluidics

Mikail Temirel, Sajjad Rahmani Dabbagh and S. Tasoglu

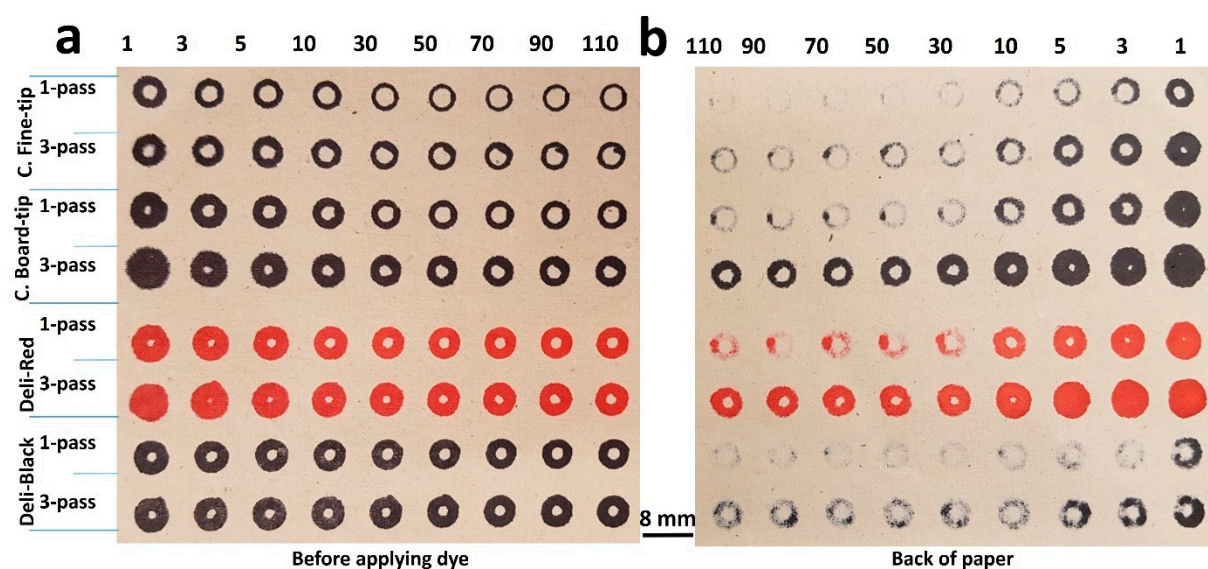

**Figure S1.** Images of 4 mm in diameter patterns plotted by AxiDraw using several markers including Comix (fine and board tips) and Deli (red and black colors) brand markers. Different plotting speeds, ranging from 1% to 110%, and multiple passes were tested. **(a)** The front view of plotted patterns before applying aqua dye. **(b)** Back view of the plotted patterns, displaying the amount of penetrated ink through the thickness of hemp paper.

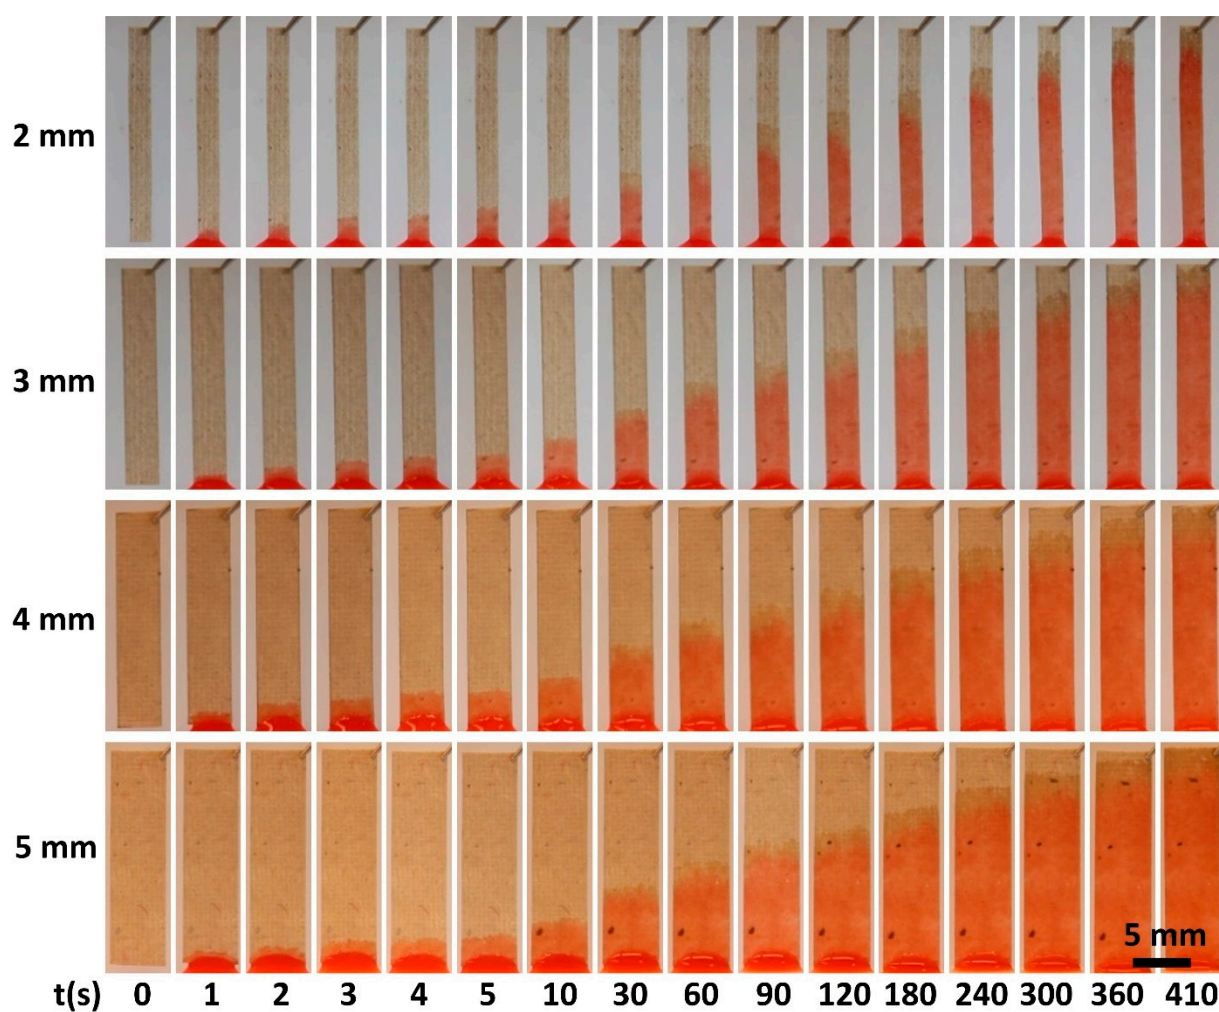

**Figure S2.** Representative images of wicking of fluid on hemp paper channels with varying channel widths from 2 mm to 5 mm over 410 s.

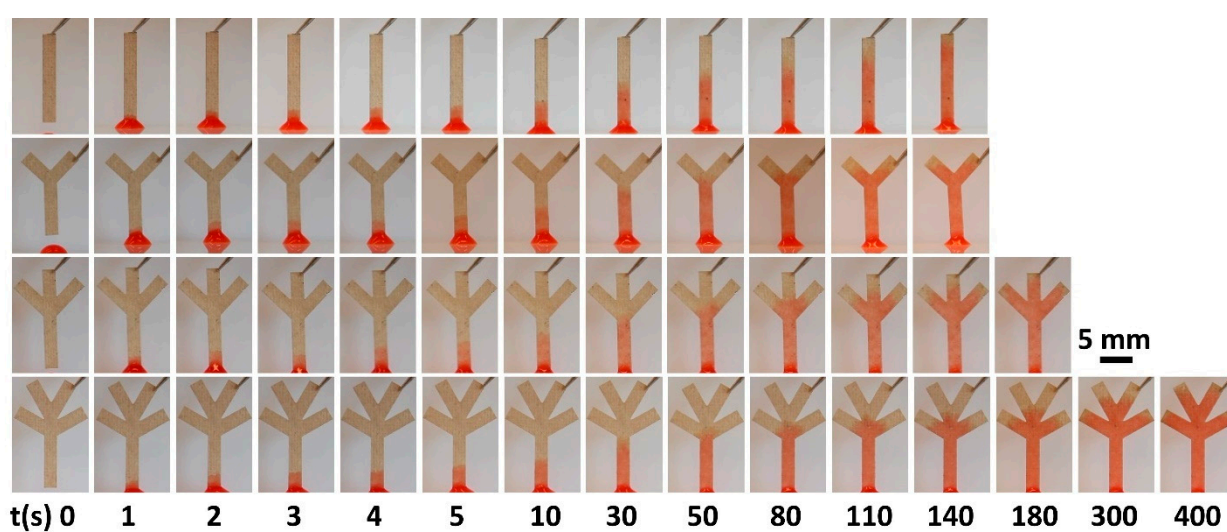

**Figure S3.** Representative images of fluid wicking on hemp paper with different number of branches, from 1 to 4, over 400 s through 2 mm width channels.

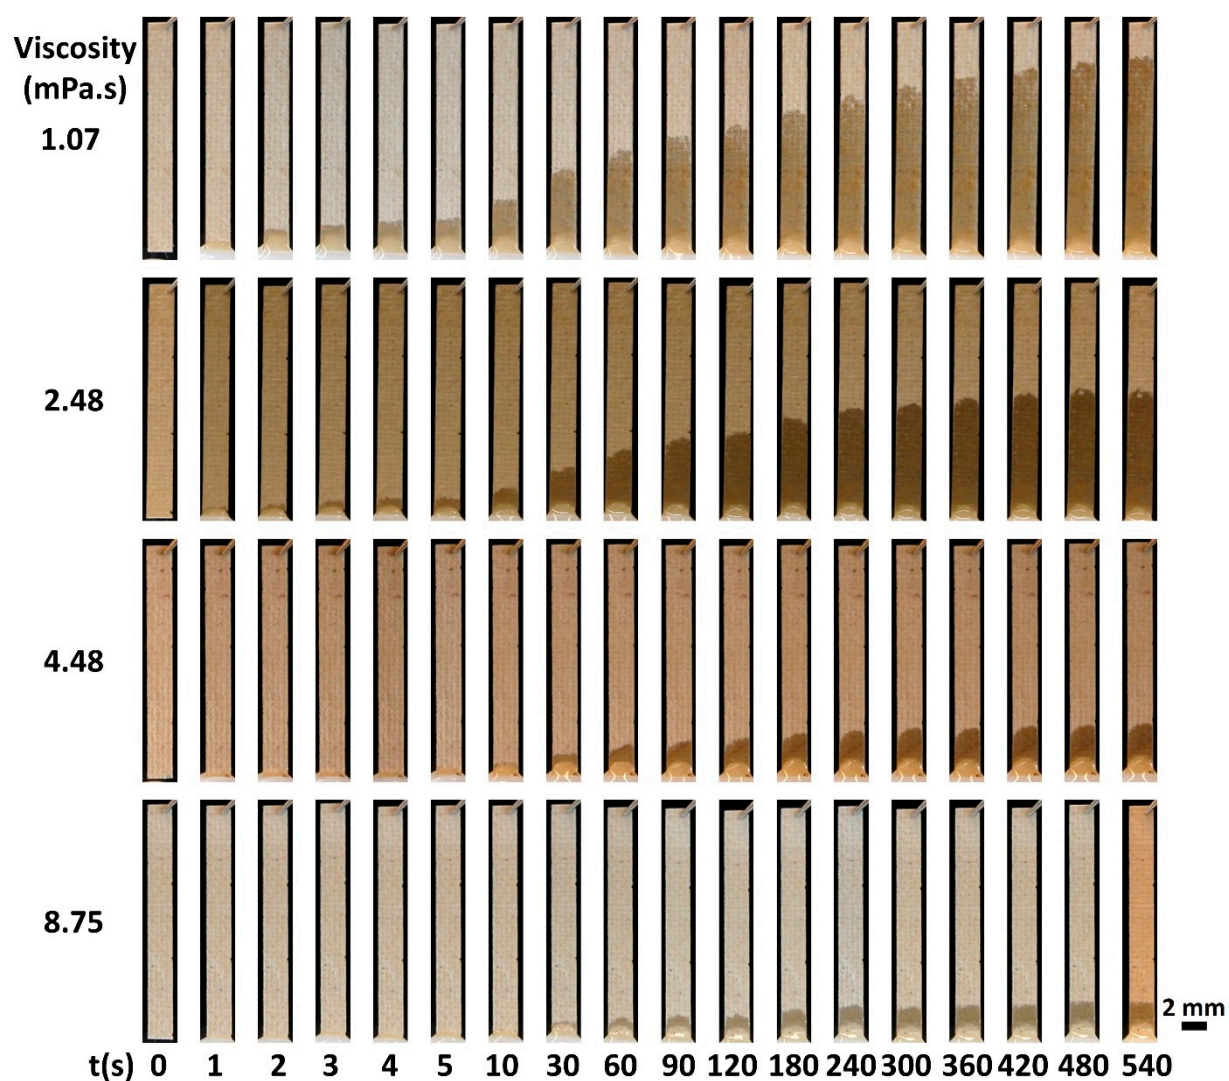

**Figure S4.** Representative images of wicking of solutions with different viscosities, from 1.07 to 8.75 mPa.s, on hemp-based microfluidic channel with a constant channel width of 2 mm .

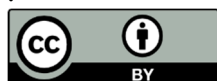

© 2021 by the authors. Submitted for possible open access publication under the terms and conditions of the Creative Commons Attribution (CC BY) license (<http://creativecommons.org/licenses/by/4.0/>).
